# Supplementary material for: Identification of non-traditional coordination environments for iron ions in nickel hydroxide lattices
Source: Royal Society of Chemistry journal article supplement (doi:10.1039/d2ee00396a), 2022-01-01
Supplement: d2ee00396a1.pdf [file d2ee00396a1.pdf]

---SUPPLEMENTARY INFORMATION---

**Identification of Non-Traditional Coordination Environments for Iron Ions in Nickel Hydroxide Lattices**

Elif Pınar Alsaç<sup>a</sup>, Keyu Zhou<sup>a</sup>, Wen Rong<sup>a</sup>, Soma Salamon<sup>b</sup>, Joachim Landers<sup>b</sup>, Heiko Wende<sup>b</sup>,  
and Rodney D. L. Smith<sup>a,c,d\*</sup>

<sup>a</sup>*Department of Chemistry, University of Waterloo, 200 University Avenue W., Waterloo, Ontario, Canada N2L 3G1*

<sup>b</sup>*Faculty of Physics and Center for Nanointegration Duisburg-Essen (CENIDE), University of Duisburg-Essen, Lotharstr. 1, D-47057, Duisburg, Germany*

<sup>c</sup>*Waterloo Institute for Nanotechnology, University of Waterloo, 200 University Avenue W., Waterloo, Ontario, Canada N2L 3G1*

<sup>d</sup>*Waterloo Artificial Intelligence Institute, University of Waterloo, 200 University Avenue W., Waterloo, Ontario, Canada N2L 3G1*

*Correspondence to:*

[rodsmith@uwaterloo.ca](mailto:rodsmith@uwaterloo.ca)

**Table S1.** Charges passed in the pre-catalytic cathodic redox peaks in cyclic voltammograms that are used to normalize current flow in electrochemical experiments.

|          | <b>Water<br/>(mC)</b> | <b>Formamide<br/>(mC)</b> |
|----------|-----------------------|---------------------------|
| 0% Fe    | 22.61                 | 23.11                     |
| 0.5% Fe  | 22.99                 | 22.58                     |
| 2.7% Fe  | 23.43                 | 16.34                     |
| 5.7% Fe  | 18.81                 | 13.36                     |
| 8.7% Fe  | 15.60                 | 26.05                     |
| 11.9% Fe | 12.43                 | 19.03                     |
| 15.3% Fe | 2.838                 | 4.982                     |
| 18.9% Fe | 12.12                 | 18.84                     |
| 21.4% Fe | 18.32                 | 12.44                     |

**Table S2.** Location of the Ni and Fe K-edges from XANES spectra on the two sample series.<sup>a</sup>

|        | <b>Formamide Sample Series</b> |                    | <b>Water Sample Series</b> |                    |
|--------|--------------------------------|--------------------|----------------------------|--------------------|
|        | <b>Ni K-edge</b>               | <b>Fe K-edge</b>   | <b>Ni K-edge</b>           | <b>Fe K-edge</b>   |
| 0% Fe  | 8341.33<br>(0.002)             |                    | 8341.39<br>(0.035)         |                    |
| 5% Fe  | 8341.38<br>(0.004)             | 7124.97<br>(0.054) | 8341.26<br>(0.006)         | 7124.58<br>(0.067) |
| 10% Fe | 8341.39<br>(0.068)             | 7124.63<br>(0.041) | 8341.53<br>(0.006)         | 7124.56<br>(0.024) |
| 15% Fe | 8341.46<br>(0.004)             | 7124.47<br>(0.025) | 8341.38<br>(0.006)         | 7124.39<br>(0.042) |
| 20% Fe | 8341.44<br>(0.027)             | 7124.33<br>(0.025) | 8341.34<br>(0.009)         | 7124.30<br>(0.023) |
| 25% Fe | 8341.49<br>(0.004)             | 7124.17<br>(0.011) | 8341.42<br>(0.003)         | 7124.06<br>(0.011) |
| 30% Fe | 8341.48<br>(0.009)             | 7124.93<br>(0.014) | 8341.43<br>(0.009)         | 7123.90<br>(0.026) |

<sup>a</sup> estimated errors are standard deviation from all individual spectra per sample

**Table S3.** EXAFS preliminary simulation parameters of Ni K-edge of water series

| <b>Sample</b> | $\sigma_o^2$         | $\sigma_{Ni}^2$    | $E_o$            | $R_{Ni-O}$        | $R_{Ni-M}$        | <b>R-factor</b> |
|---------------|----------------------|--------------------|------------------|-------------------|-------------------|-----------------|
| 0% Fe         | 0.0057<br>(0.0005)   | 0.0071<br>(0.0005) | 8.174<br>(0.476) | 2.065<br>(0.0057) | 3.116<br>(0.0053) | 0.006           |
| 5% Fe         | 0.0069<br>(0.0005)   | 0.0077<br>(0.0004) | 8.328<br>(0.421) | 2.068<br>(0.0052) | 3.116<br>(0.0048) | 0.007           |
| 10% Fe        | (0.0053)<br>(0.0006) | 0.0070<br>(0.0006) | 8.290<br>(0.599) | 2.065<br>(0.007)  | 3.110<br>(0.007)  | 0.010           |
| 15% Fe        | 0.0061<br>(0.0005)   | 0.0073<br>(0.0005) | 8.097<br>(0.516) | 2.063<br>(0.006)  | 3.103<br>(0.005)  | 0.007           |
| 20% Fe        | 0.0073<br>(0.0006)   | 0.0078<br>(0.0005) | 8.133<br>(0.582) | 2.062<br>(0.007)  | 3.098<br>(0.006)  | 0.014           |
| 25% Fe        | 0.0065<br>(0.0008)   | 0.0075<br>(0.0008) | 8.329<br>(0.767) | 2.065<br>(0.009)  | 3.095<br>(0.008)  | 0.019           |
| 30% Fe        | 0.0058<br>(0.0007)   | 0.0074<br>(0.0007) | 8.146<br>(0.679) | 2.061<br>(0.008)  | 3.090<br>(0.007)  | 0.012           |

$N_{Ni-O}, N_{Ni-M} = 6, S_o^2 = 0.75, E_{o,Ni} = 8333 \text{ eV}$

**Table S4.** EXAFS preliminary simulation parameters of Fe K-edge of water series

| <b>Sample</b> | $\sigma_o^2$       | $\sigma_{Fe}^2$    | $E_o$             | $R_{Fe-O}$       | $R_{Fe-M}$       | <b>R-factor</b> |
|---------------|--------------------|--------------------|-------------------|------------------|------------------|-----------------|
| 5% Fe         | 0.0039<br>(0.0006) | 0.0065<br>(0.0007) | 12.362<br>(0.555) | 2.000<br>(0.007) | 3.112<br>(0.007) | 0.015           |
| 10% Fe        | 0.0041<br>(0.0005) | 0.0068<br>(0.0007) | 12.342<br>(0.492) | 2.000<br>(0.006) | 3.108<br>(0.006) | 0.013           |
| 15% Fe        | 0.0047<br>(0.0005) | 0.0071<br>(0.0007) | 12.163<br>(0.500) | 1.998<br>(0.006) | 3.100<br>(0.007) | 0.015           |
| 20% Fe        | 0.0062<br>(0.0006) | 0.0078<br>(0.0007) | 12.181<br>(0.521) | 1.996<br>(0.007) | 3.090<br>(0.007) | 0.023           |
| 25% Fe        | 0.0080<br>(0.0008) | 0.0090<br>(0.0009) | 12.054<br>(0.641) | 1.991<br>(0.008) | 3.086<br>(0.009) | 0.027           |
| 30% Fe        | 0.0089<br>(0.0008) | 0.0103<br>(0.0012) | 11.883<br>(0.715) | 1.989<br>(0.010) | 3.076<br>(0.011) | 0.044           |

$N_{Fe-O}, N_{Fe-M} = 6, S_o^2 = 0.80, E_{o,Fe} = 7112 \text{ eV}$

**Table S5.** EXAFS preliminary simulation parameters of Ni K-edge of formamide series

| <b>Sample</b> | $\sigma_{\text{O}}^2$ | $\sigma_{\text{Ni}}^2$ | $E_0$            | $R_{\text{Ni-O}}$ | $R_{\text{Ni-M}}$ | <b>R-factor</b> |
|---------------|-----------------------|------------------------|------------------|-------------------|-------------------|-----------------|
| 0% Fe         | 0.0061<br>(0.0005)    | 0.0074<br>(0.0005)     | 8.196<br>(0.497) | 2.064<br>(0.006)  | 3.118<br>(0.005)  | 0.012           |
| 5% Fe         | 0.0060<br>(0.0005)    | 0.0074<br>(0.0005)     | 8.005<br>(0.501) | 2.061<br>(0.006)  | 3.110<br>(0.005)  | 0.009           |
| 10% Fe        | 0.0057<br>(0.0006)    | 0.0072<br>(0.0006)     | 7.996<br>(0.598) | 2.058<br>(0.007)  | 3.102<br>(0.006)  | 0.013           |
| 15% Fe        | 0.0056<br>(0.0007)    | 0.0071<br>(0.0007)     | 8.185<br>(0.648) | 2.059<br>(0.008)  | 3.099<br>(0.007)  | 0.013           |
| 20% Fe        | 0.0058<br>(0.0007)    | 0.0070<br>(0.0007)     | 8.100<br>(0.686) | 2.059<br>(0.008)  | 3.095<br>(0.007)  | 0.013           |
| 25% Fe        | 0.0052<br>(0.0007)    | 0.0070<br>(0.0007)     | 8.145<br>(0.717) | 2.057<br>(0.008)  | 3.092<br>(0.008)  | 0.016           |
| 30% Fe        | 0.0050<br>(0.0007)    | 0.0074<br>(0.0008)     | 8.312<br>(0.736) | 2.060<br>(0.009)  | 3.092<br>(0.009)  | 0.020           |

$N_{\text{Ni-O}}, N_{\text{Ni-M}} = 6, S_0^2 = 0.75, E_{0,\text{Ni}} = 8333 \text{ eV}$

**Table S6.** EXAFS preliminary simulation parameters of Fe K-edge of formamide series

| <b>Sample</b> | $\sigma_{\text{O}}^2$ | $\sigma_{\text{Fe}}^2$ | $E_0$             | $R_{\text{Fe-O}}$ | $R_{\text{Fe-M}}$ | <b>R-factor</b> |
|---------------|-----------------------|------------------------|-------------------|-------------------|-------------------|-----------------|
| 5% Fe         | 0.0037<br>(0.0006)    | 0.0053<br>(0.0006)     | 13.085<br>(0.521) | 2.002<br>(0.006)  | 3.111<br>(0.006)  | 0.012           |
| 10% Fe        | 0.0042<br>(0.0005)    | 0.0051<br>(0.0005)     | 12.755<br>(0.473) | 1.998<br>(0.006)  | 3.096<br>(0.005)  | 0.010           |
| 15% Fe        | 0.0049<br>(0.0006)    | 0.0060<br>(0.0006)     | 12.623<br>(0.561) | 1.997<br>(0.007)  | 3.089<br>(0.006)  | 0.013           |
| 20% Fe        | 0.0065<br>(0.0007)    | 0.0070<br>(0.0007)     | 12.704<br>(0.590) | 1.998<br>(0.008)  | 3.089<br>(0.007)  | 0.017           |
| 25% Fe        | 0.0079<br>(0.0007)    | 0.0082<br>(0.0007)     | 12.472<br>(0.560) | 1.994<br>(0.007)  | 3.081<br>(0.007)  | 0.015           |
| 30% Fe        | 0.0093<br>(0.0009)    | 0.0092<br>(0.0010)     | 12.623<br>(0.708) | 1.995<br>(0.010)  | 3.077<br>(0.009)  | 0.023           |

$N_{\text{Fe-O}}, N_{\text{Fe-M}} = 6, S_0^2 = 0.80, E_{0,\text{Fe}} = 7112 \text{ eV}$

**Table S7.** EXAFS final simulation parameters of Ni K-edge of water series

| <b>Sample</b> | $\sigma_{\text{O}}^2$ | $\sigma_{\text{Ni}}^2$ | $R_{\text{Ni-O}}$ | $R_{\text{Ni-M}}$ | $R\text{-factor}$ |
|---------------|-----------------------|------------------------|-------------------|-------------------|-------------------|
| 0% Fe         | 0.0058<br>(0.0005)    | 0.0072<br>(0.0005)     | 2.065<br>(0.003)  | 3.116<br>(0.004)  | 0.0064            |
| 5% Fe         | 0.0069<br>(0.0004)    | 0.0077<br>(0.0004)     | 2.066<br>(0.002)  | 3.115<br>(0.003)  | 0.0072            |
| 10% Fe        | 0.0053<br>(0.0006)    | 0.0070<br>(0.0006)     | 2.063<br>(0.003)  | 3.109<br>(0.005)  | 0.010             |
| 15% Fe        | 0.0061<br>(0.0005)    | 0.0073<br>(0.0005)     | 2.063<br>(0.003)  | 3.104<br>(0.004)  | 0.008             |
| 20% Fe        | 0.0073<br>(0.0006)    | 0.0078<br>(0.0005)     | 2.062<br>(0.003)  | 3.098<br>(0.004)  | 0.014             |
| 25% Fe        | 0.0064<br>(0.0008)    | 0.0075<br>(0.0007)     | 2.063<br>(0.004)  | 3.093<br>(0.006)  | 0.018             |
| 30% Fe        | 0.0058<br>(0.0007)    | 0.0074<br>(0.0006)     | 2.061<br>(0.004)  | 3.090<br>(0.005)  | 0.012             |

$N_{\text{Ni-O}}, N_{\text{Ni-M}} = 6, S_0^2 = 0.75, E_{0,\text{Ni}} = 8333 \text{ eV}, E_0 = 8.15 \text{ eV}$

**Table S8.** EXAFS final simulation parameters of Fe K-edge of water series

| <b>Sample</b> | $\sigma_{\text{O}}^2$ | $\sigma_{\text{Fe}}^2$ | $R_{\text{Fe-O}}$ | $R_{\text{Fe-M}}$ | $R\text{-factor}$ |
|---------------|-----------------------|------------------------|-------------------|-------------------|-------------------|
| 5% Fe         | 0.0039<br>(0.0006)    | 0.0065<br>(0.0007)     | 1.998<br>(0.003)  | 3.110<br>(0.006)  | 0.016             |
| 10% Fe        | 0.0041<br>(0.0005)    | 0.0068<br>(0.0006)     | 1.998<br>(0.003)  | 3.106<br>(0.005)  | 0.014             |
| 15% Fe        | 0.0047<br>(0.0005)    | 0.0071<br>(0.0006)     | 1.998<br>(0.003)  | 3.100<br>(0.005)  | 0.015             |
| 20% Fe        | 0.0062<br>(0.0006)    | 0.0078<br>(0.0007)     | 1.995<br>(0.003)  | 3.090<br>(0.005)  | 0.023             |
| 25% Fe        | 0.0080<br>(0.0007)    | 0.0090<br>(0.0009)     | 1.993<br>(0.004)  | 3.087<br>(0.007)  | 0.027             |
| 30% Fe        | 0.0089<br>(0.0008)    | 0.0103<br>(0.0011)     | 1.992<br>(0.004)  | 3.078<br>(0.008)  | 0.042             |

$N_{\text{Fe-O}}, N_{\text{Fe-M}} = 6, S_0^2 = 0.80, E_{0,\text{Fe}} = 7112, E_0: 12.15 \text{ eV}$

**Table S9.** EXAFS final simulation parameters of Ni K-edge of formamide series

| <b>Sample</b> | $\sigma_{\text{O}}^2$ | $\sigma_{\text{Ni}}^2$ | $R_{\text{Ni-O}}$ | $R_{\text{Ni-M}}$ | $R\text{-factor}$ |
|---------------|-----------------------|------------------------|-------------------|-------------------|-------------------|
| 0% Fe         | 0.061<br>(0.0005)     | 0.0074<br>(0.0005)     | 2.064<br>(0.003)  | 3.118<br>(0.004)  | 0.012             |
| 5% Fe         | 0.006<br>(0.0005)     | 0.0074<br>(0.0005)     | 2.062<br>(0.003)  | 3.111<br>(0.004)  | 0.009             |
| 10% Fe        | 0.0057<br>(0.0006)    | 0.0072<br>(0.0006)     | 2.060<br>(0.003)  | 3.104<br>(0.005)  | 0.013             |
| 15% Fe        | 0.0056<br>(0.0006)    | 0.0071<br>(0.0006)     | 2.059<br>(0.004)  | 3.099<br>(0.005)  | 0.013             |
| 20% Fe        | 0.0058<br>(0.0007)    | 0.0070<br>(0.0007)     | 2.059<br>(0.004)  | 3.095<br>(0.005)  | 0.014             |
| 25% Fe        | 0.0052<br>(0.0007)    | 0.0069<br>(0.0007)     | 2.057<br>(0.004)  | 3.092<br>(0.006)  | 0.016             |
| 30% Fe        | 0.0050<br>(0.0007)    | 0.0075<br>(0.0008)     | 2.058<br>(0.004)  | 3.090<br>(0.007)  | 0.020             |

$N_{\text{Ni-O}}, N_{\text{Ni-M}} = 6, S_0^2 = 0.75, E_{0,\text{Ni}} = 8333 \text{ eV}, E_0 = 8.15 \text{ eV}$

**Table S10.** EXAFS final simulation parameters of Fe K-edge of formamide series

| <b>Sample</b> | $\sigma_{\text{O}}^2$ | $\sigma_{\text{Fe}}^2$ | $R_{\text{Fe-O}}$ | $R_{\text{Fe-M}}$ | $R\text{-factor}$ |
|---------------|-----------------------|------------------------|-------------------|-------------------|-------------------|
| 5% Fe         | 0.0036<br>(0.0006)    | 0.0053<br>(0.0006)     | 1.992<br>(0.004)  | 3.104<br>(0.005)  | 0.017             |
| 10% Fe        | 0.0042<br>(0.0005)    | 0.0052<br>(0.0005)     | 1.992<br>(0.003)  | 3.092<br>(0.004)  | 0.012             |
| 15% Fe        | 0.0049<br>(0.0006)    | 0.0060<br>(0.0006)     | 1.992<br>(0.003)  | 3.085<br>(0.005)  | 0.014             |
| 20% Fe        | 0.0065<br>(0.0007)    | 0.0070<br>(0.0007)     | 1.992<br>(0.004)  | 3.085<br>(0.006)  | 0.019             |
| 25% Fe        | 0.0078<br>(0.0006)    | 0.0082<br>(0.0007)     | 1.990<br>(0.003)  | 3.078<br>(0.005)  | 0.015             |
| 30% Fe        | 0.0092<br>(0.0008)    | 0.0092<br>(0.0009)     | 1.989<br>(0.004)  | 3.073<br>(0.007)  | 0.024             |

$N_{\text{Fe-O}}, N_{\text{Fe-M}} = 6, S_0^2 = 0.80, E_{0,\text{Fe}} = 7112, E_0: 12.15 \text{ eV}$

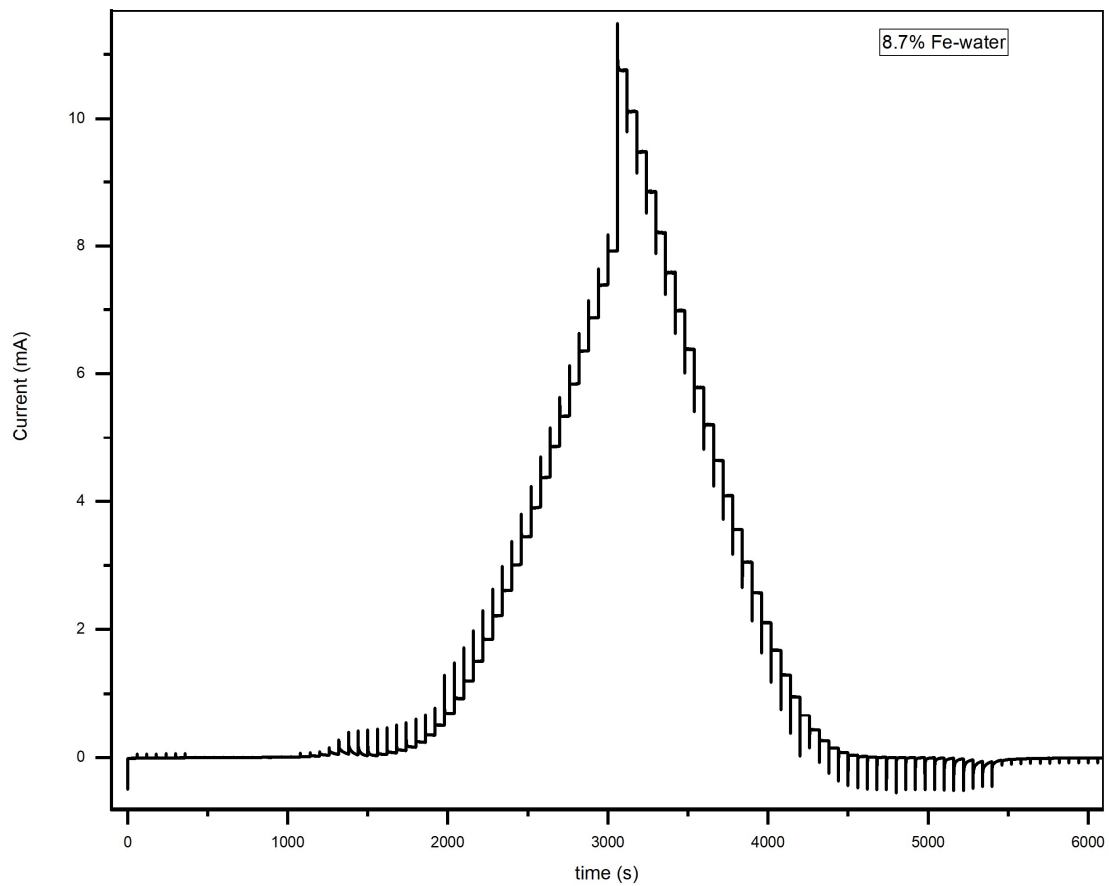

**Figure S1.** Sample chronoamperometry experiment to identify steady-state electrokinetic parameters of the materials.

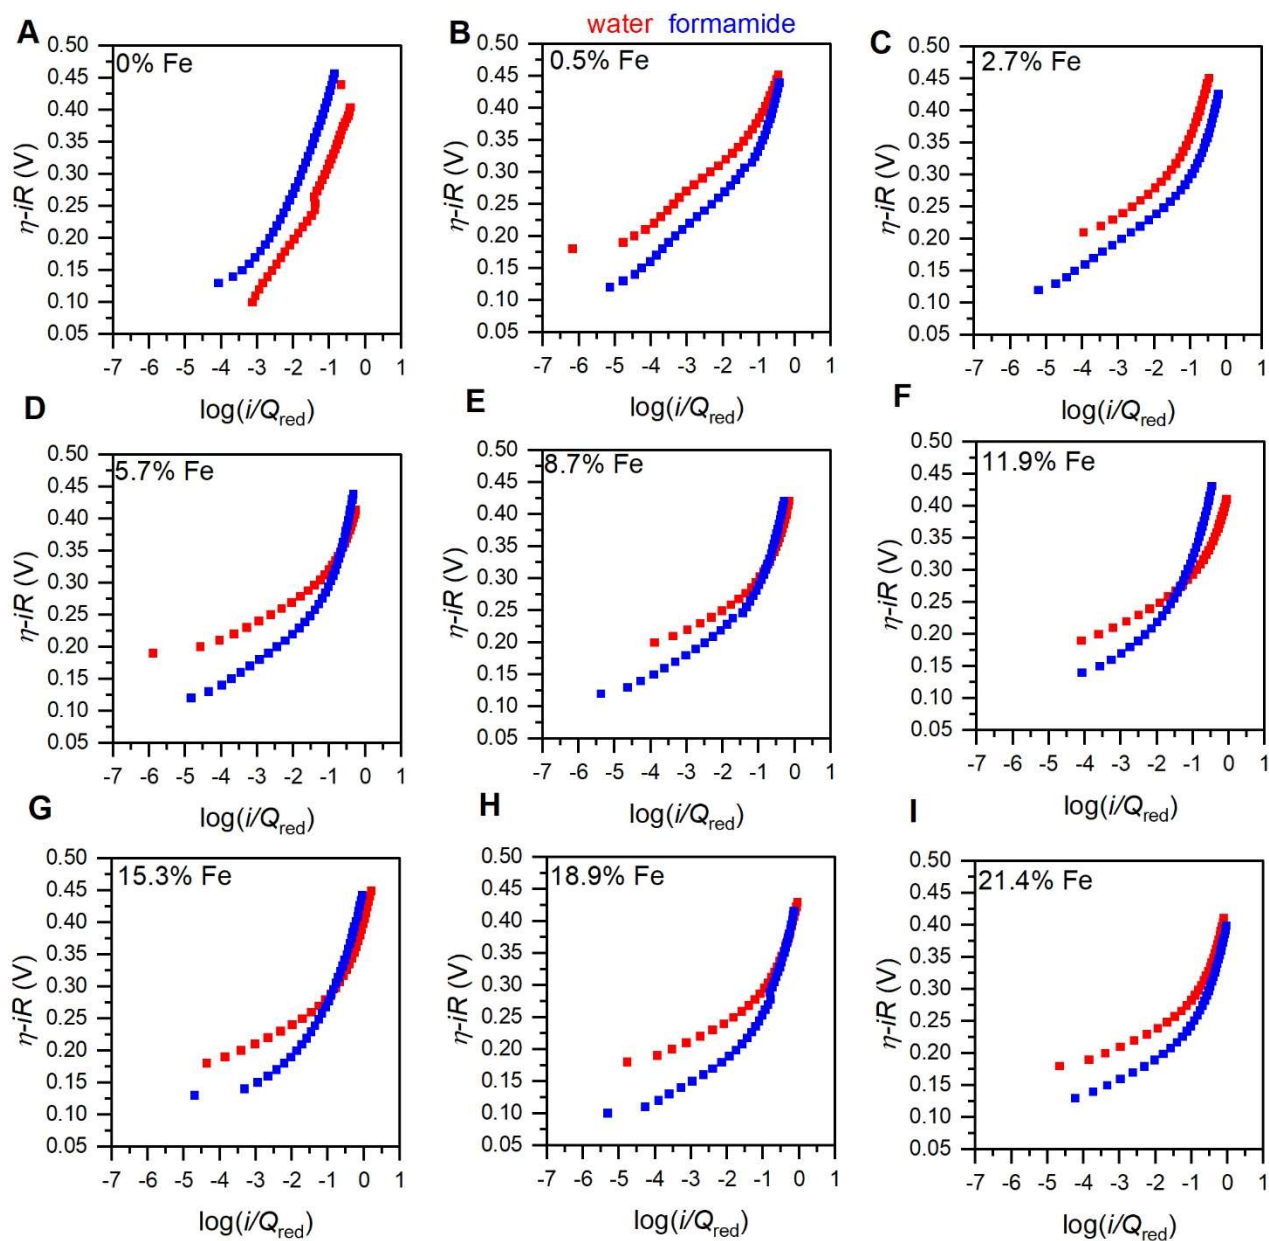

**Figure S2.** Electron transfer kinetics of water (red) and formamide(blue) series. Synthesis dependent Tafel plots for (A) 0% Fe, (B) 0.5% Fe, (C) 2.7% Fe, (D) 5.7% Fe, (E) 8.7% Fe, (F)11.9% Fe, (G) 15.3% Fe, (H) 18.9% Fe, (I) 21.4% Fe.



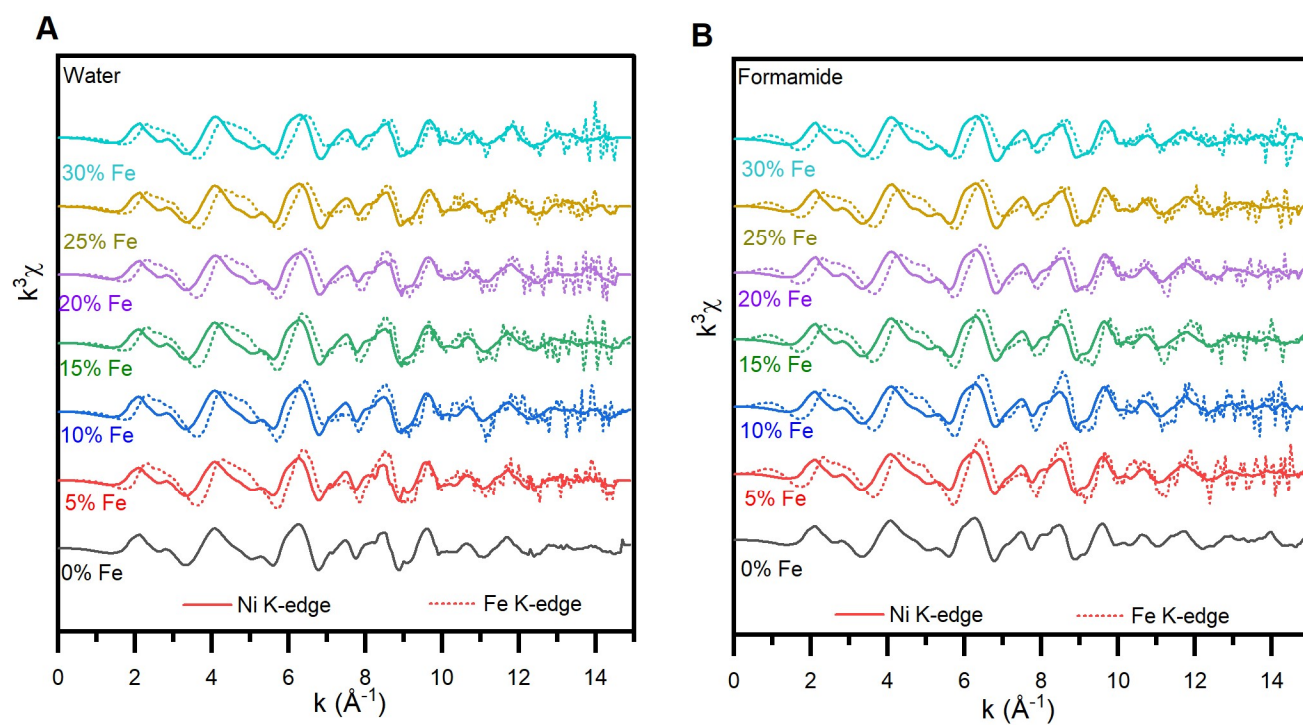

**Figure S3:** k-space X-ray absorption fine-structure spectra of water (A) and formamide (B) series at the Ni K-edge (solid lines) and Fe K-edge (dotted lines).

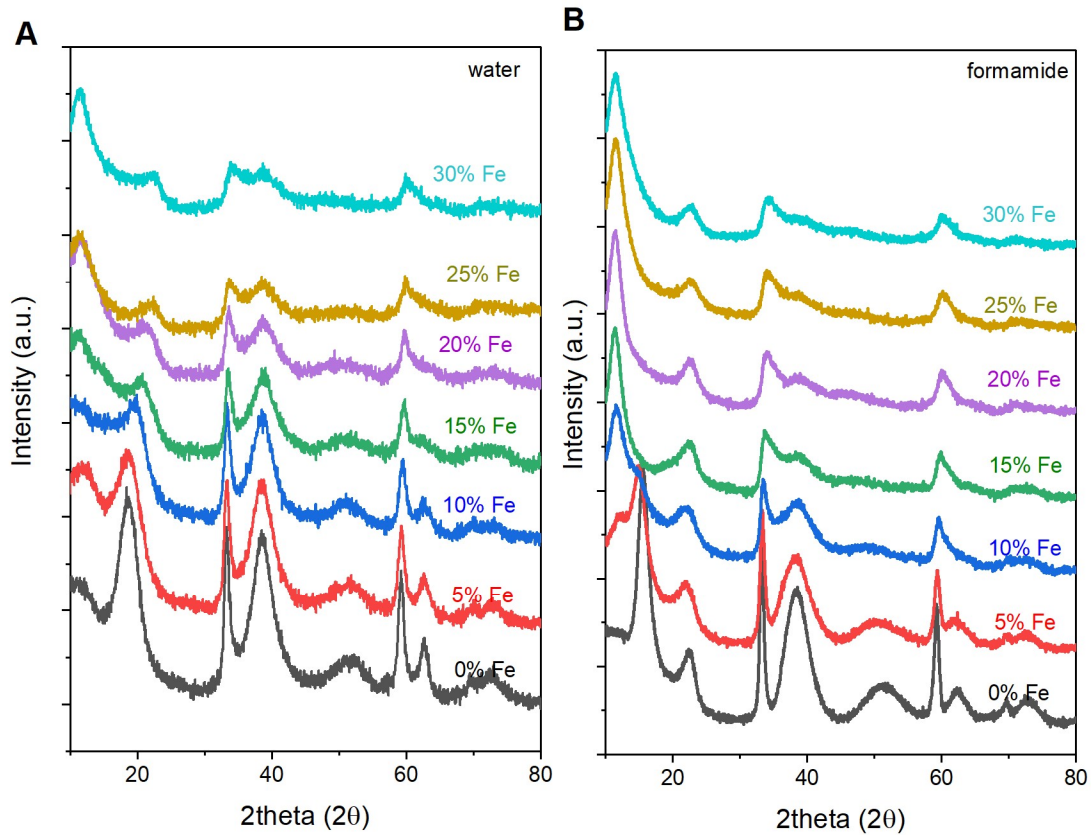

**Figure S4:** XRD patterns of the samples used in EXAFS analysis. (A) water series (B) formamide series

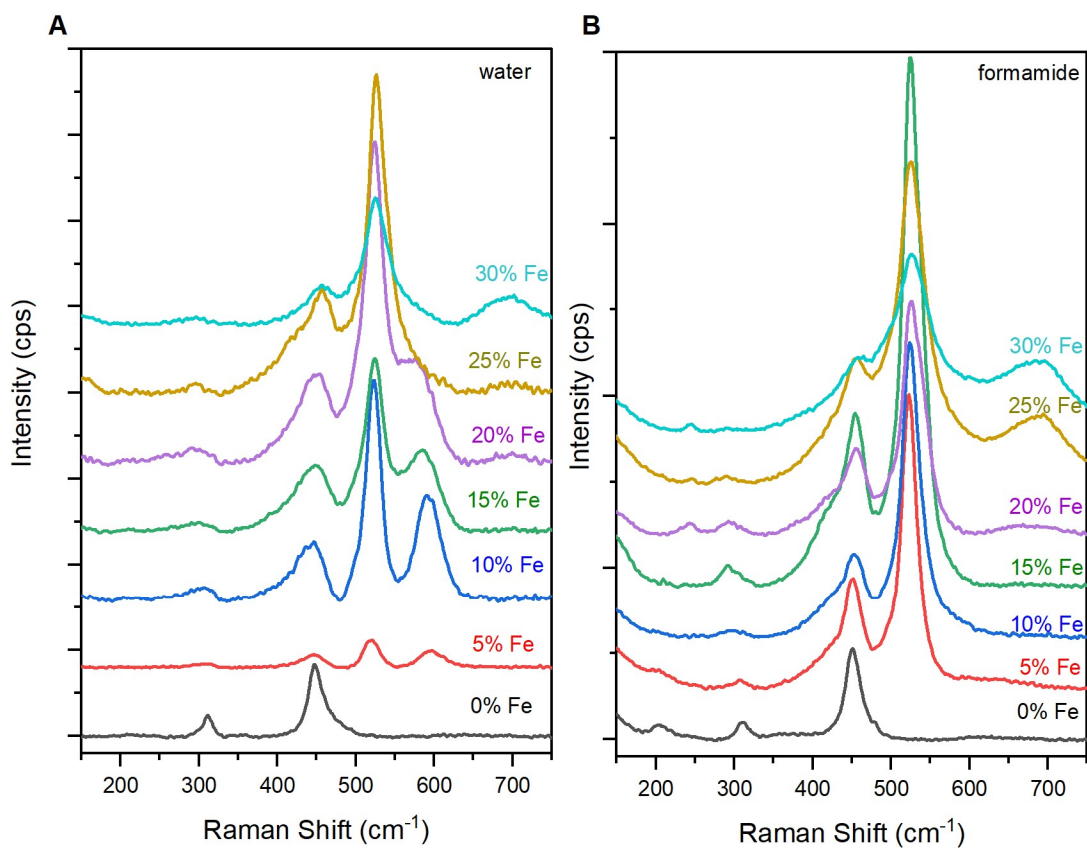

**Figure S5:** Low wavenumber Raman spectra on  $\text{Fe}_x\text{Ni}_{1-x}(\text{OH})_2$  samples used in EXAFS analysis. Data for the (A) water and (B) formamide sample series.

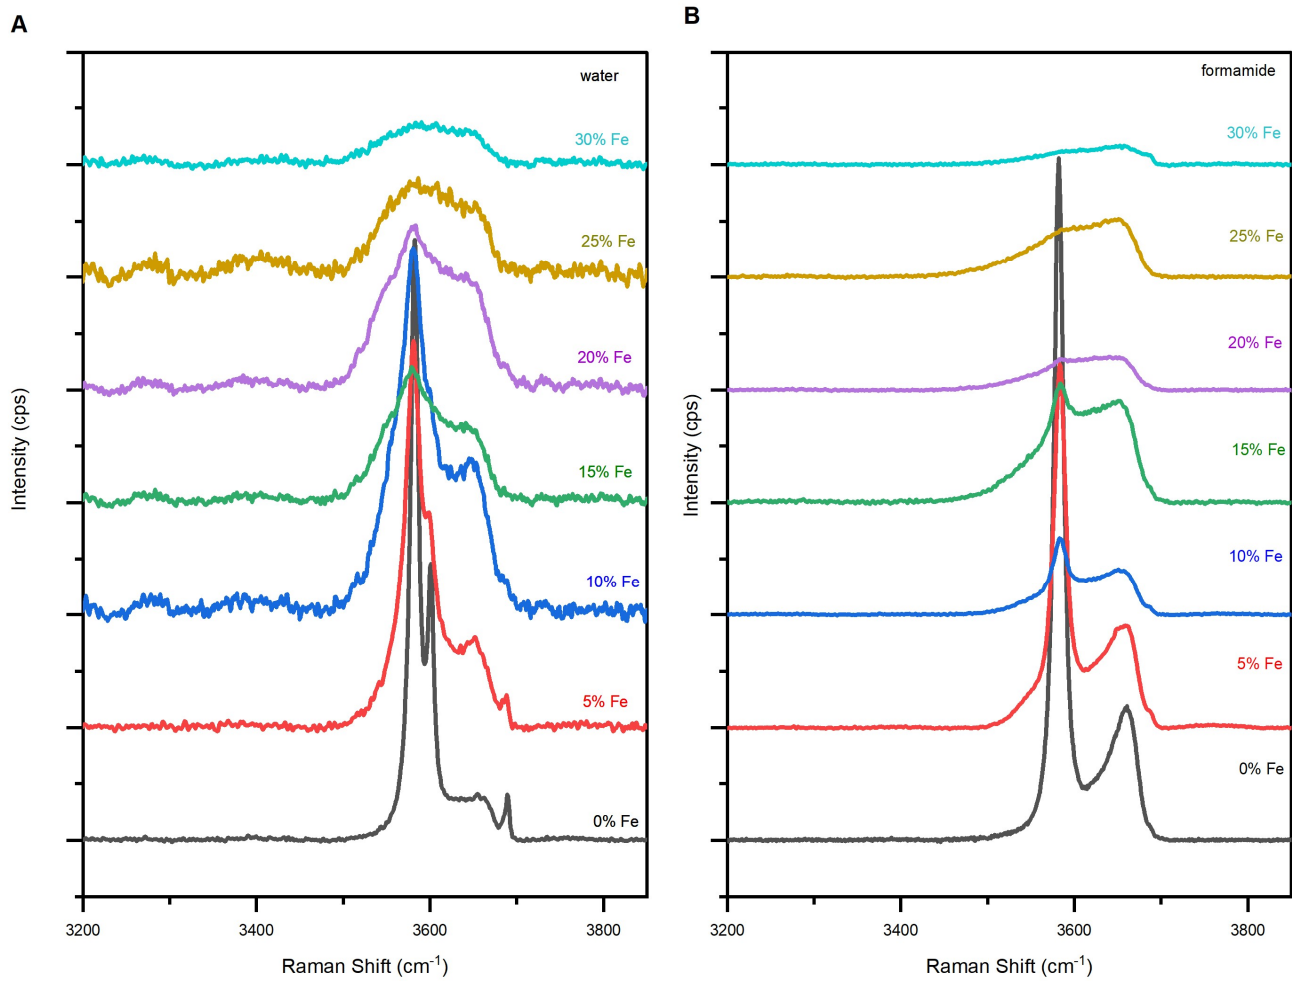

**Figure S6:** High wavenumber Raman spectra on  $\text{Fe}_x\text{Ni}_{1-x}(\text{OH})_2$  samples used in EXAFS analysis. Data for the (A) water and (B) formamide sample series.

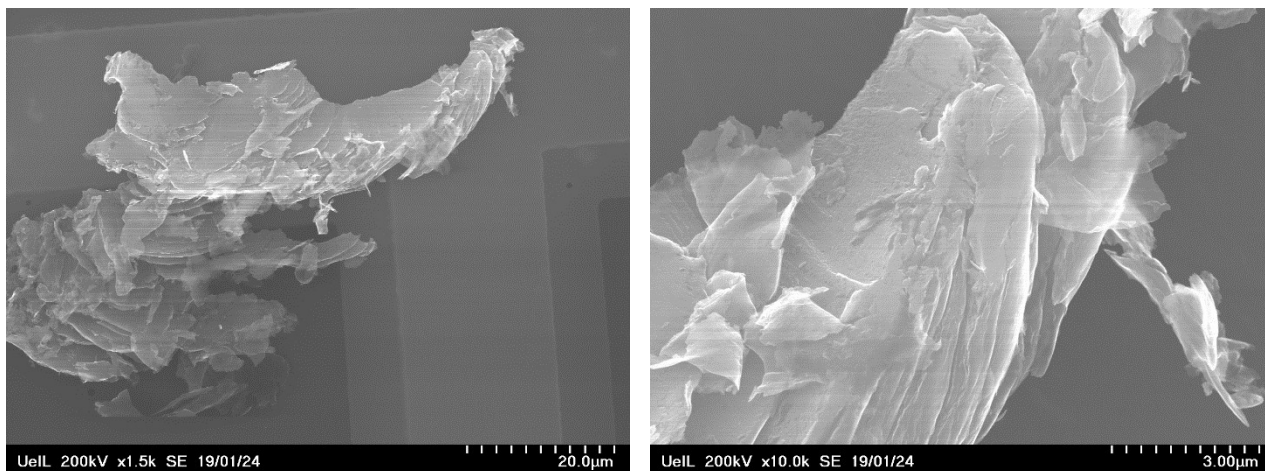

**Figure S7:** Electron micrographs obtained on  $\text{Fe}_{0.214}\text{Ni}_{0.786}(\text{OH})_2$  synthesized in the presence of formamide.

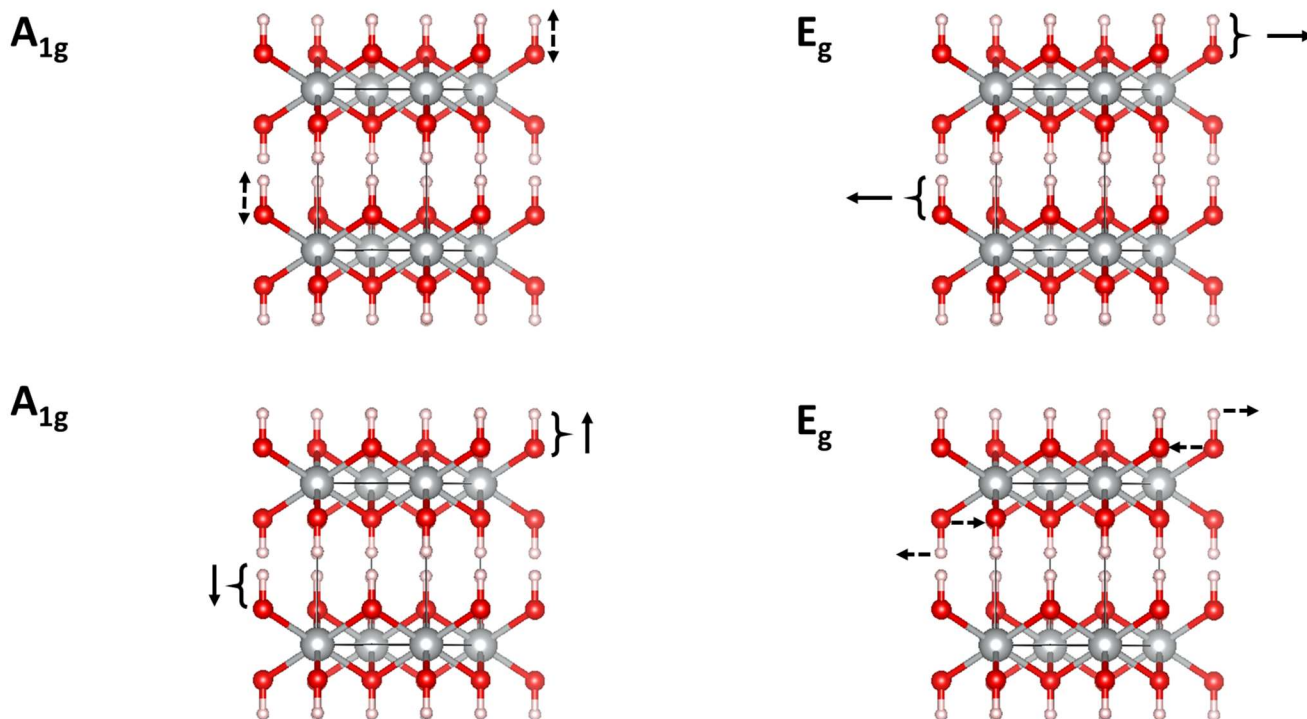

**Figure S8:** Raman active modes of brucite ( $\beta\text{-Ni(OH)}_2$ ). Figure is adapted from<sup>1</sup>

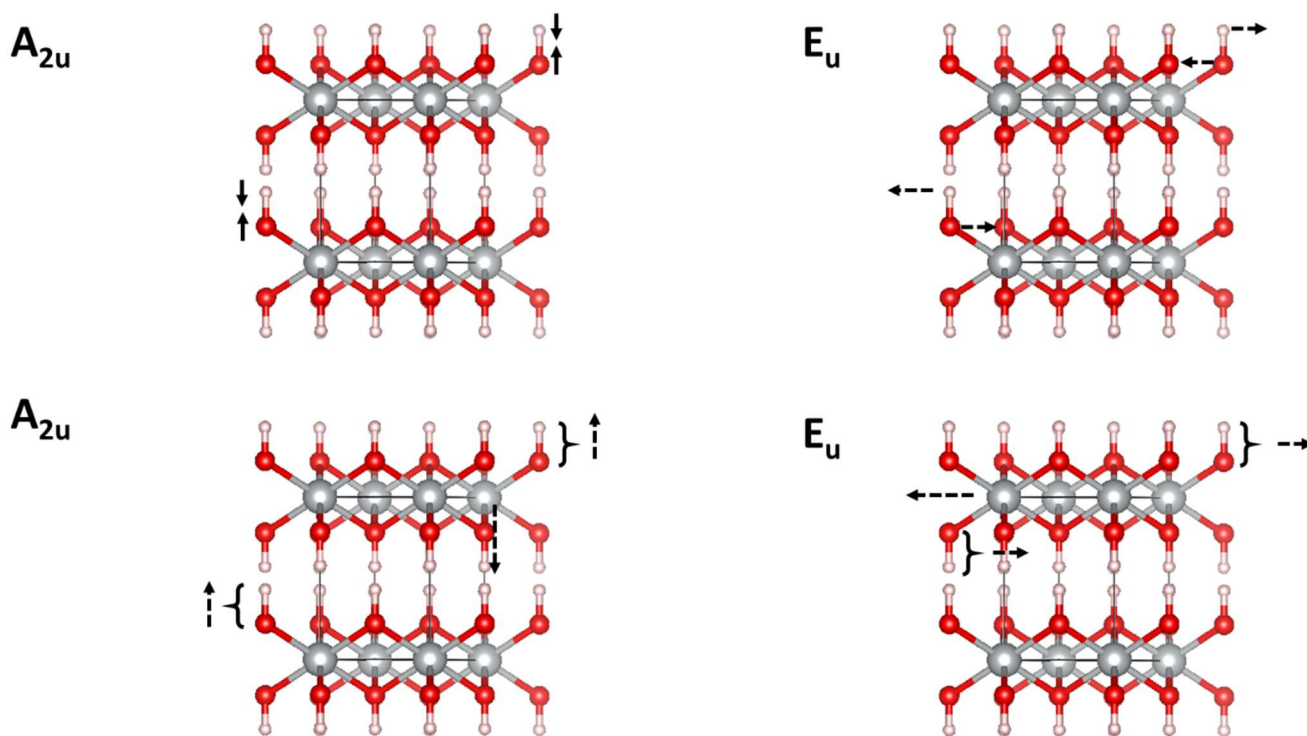

**Figure S9:** Infrared active modes of brucite ( $\beta\text{-Ni(OH)}_2$ ). Figure is adapted from<sup>1</sup>

**REFERENCES:**

- (1) Bantignies, J. L.; Deabate, S.; Righi, A.; Rols, S.; Hermet, P.; Sauvajol, J. L.; Henn, F. New Insight into the Vibrational Behavior of Nickel Hydroxide and Oxyhydroxide Using Inelastic Neutron Scattering, Far/Mid-Infrared and Raman Spectroscopies. *Journal of Physical Chemistry C* **2008**, *112* (6), 2193–2201. <https://doi.org/10.1021/jp075819e>.
